# Supplementary material for: Ligand-Induced Variations in Structural and Dynamical Properties Within an Enzyme Superfamily
Source: PubMed Central journal article supplement (PMC6005897; doi:10.3389/fmolb.2018.00054), 2018-06-12
Supplement: Data_Sheet_1.pdf [file Data_Sheet_1.pdf]

1 **Supporting Information**

2

3 **Ligand-induced variations in structural and dynamical properties within an enzyme superfamily**

4 Chitra Narayanan<sup>1</sup>, David N. Bernard<sup>1</sup>, Khushboo Bafna<sup>2</sup>, Donald Gagné<sup>1,†</sup>, Pratul K. Agarwal<sup>3,4</sup>,  
5 Nicolas Doucet<sup>1,5,\*</sup>

6 <sup>1</sup>INRS – Institut Armand-Frappier, Université du Québec, 531 Boulevard des Prairies, Laval, QC, H7V  
7 1B7, Canada.

8 <sup>2</sup>Genome Science and Technology, University of Tennessee, Knoxville, TN 37996.

9 <sup>3</sup>Computational Biology Institute and Computer Science and Engineering Division, Oak Ridge National  
10 Laboratory, 1 Bethel Valley Road, Oak Ridge, TN 37830.

11 <sup>4</sup>Department of Biochemistry, Cellular and Molecular Biology, University of Tennessee, Knoxville, TN  
12 37996.

13 <sup>5</sup>PROTEO, the Québec Network for Research on Protein Function, Engineering, and Applications, 1045  
14 Avenue de la Médecine, Université Laval, Québec, QC, G1V 0A6, Canada.

15

16 <sup>†</sup>Present address: Structural Biology Initiative, CUNY Advanced Science Research Center, New York,  
17 NY, 10032.

18 \*To whom correspondence should be addressed: Nicolas Doucet ([nicolas.doucet@iaf.inrs.ca](mailto:nicolas.doucet@iaf.inrs.ca))

19

20

21 **Table S1. List of residues displaying  $\Delta\delta_{\text{obs}} \geq 0.1$  ppm upon 3'-UMP and 5'-AMP binding to the five**  
 22 **RNases**

| Residues displaying $\Delta\delta \geq 0.1$ ppm upon UMP binding |                      |           |                      |           |                      |           |                      |           |                      |
|------------------------------------------------------------------|----------------------|-----------|----------------------|-----------|----------------------|-----------|----------------------|-----------|----------------------|
| RNA_Bovine                                                       |                      | RN2_Human |                      | RN3_Human |                      | RN4_Human |                      | RN5_Human |                      |
| Residue                                                          | $\Delta\delta$ , ppm | Residue   | $\Delta\delta$ , ppm | Residue   | $\Delta\delta$ , ppm | Residue   | $\Delta\delta$ , ppm | Residue   | $\Delta\delta$ , ppm |
| 11                                                               | 0.145                | 7         | 0.147                | 4         | 0.281                | 5         | 0.105                | 11        | 0.125                |
| 12                                                               | 0.137                | 11        | 0.241                | 11        | 0.134                | 20        | 0.125                | 42        | 0.172                |
| 17                                                               | 0.149                | 15        | 0.195                | 14        | 0.194                | 42        | 0.349                | 50        | 0.113                |
| 41                                                               | 0.223                | 16        | 0.102                | 16        | 0.162                | 44        | 0.310                | 51        | 0.157                |
| 44                                                               | 0.490                | 37        | 0.229                | 31        | 0.129                | 103       | 0.114                | 53        | 0.120                |
| 45                                                               | 1.197                | 42        | 0.213                | 40        | 0.335                | 116       | 0.127                | 56        | 0.124                |
| 46                                                               | 0.258                | 43        | 0.247                | 48        | 0.118                | 117       | 0.261                | 61        | 0.107                |
| 47                                                               | 0.110                | 64        | 0.145                | 55        | 0.109                | 118       | 0.121                | 65        | 0.125                |
| 51                                                               | 0.180                | 66        | 0.101                | 57        | 0.105                |           |                      | 72        | 0.106                |
| 66                                                               | 0.152                | 82        | 0.162                | 62        | 0.123                |           |                      | 84        | 0.159                |
| 82                                                               | 0.163                | 83        | 0.209                | 64        | 0.302                |           |                      | 103       | 0.137                |
| 96                                                               | 0.149                | 103       | 0.108                | 66        | 0.238                |           |                      |           |                      |
| 97                                                               | 0.108                | 129       | 0.249                | 69        | 0.113                |           |                      |           |                      |
| 99                                                               | 0.101                | 130       | 0.477                | 75        | 0.279                |           |                      |           |                      |
| 100                                                              | 0.130                | 131       | 0.361                | 77        | 0.189                |           |                      |           |                      |
| 101                                                              | 0.187                |           |                      | 84        | 0.346                |           |                      |           |                      |
| 105                                                              | 0.107                |           |                      | 129       | 0.568                |           |                      |           |                      |
| 119                                                              | 0.225                |           |                      | 130       | 0.136                |           |                      |           |                      |
| 120                                                              | 0.403                |           |                      |           |                      |           |                      |           |                      |
| 122                                                              | 0.206                |           |                      |           |                      |           |                      |           |                      |

| Residues displaying $\Delta\delta \geq 0.1$ ppm upon AMP binding |                      |           |                      |           |                      |           |                      |           |                      |
|------------------------------------------------------------------|----------------------|-----------|----------------------|-----------|----------------------|-----------|----------------------|-----------|----------------------|
| RNA_Bovine                                                       |                      | RN2_Human |                      | RN3_Human |                      | RN4_Human |                      | RN5_Human |                      |
| Residue                                                          | $\Delta\delta$ , ppm | Residue   | $\Delta\delta$ , ppm | Residue   | $\Delta\delta$ , ppm | Residue   | $\Delta\delta$ , ppm | Residue   | $\Delta\delta$ , ppm |
| 11                                                               | 0.166                | 7         | 0.101                | 10        | 0.279                | 5         | 0.183                | 12        | 0.122                |
| 43                                                               | 0.107                | 8         | 0.208                | 41        | 0.112                | 11        | 0.100                | 14        | 0.179                |
| 45                                                               | 0.227                | 11        | 0.244                | 64        | 0.118                | 20        | 0.118                | 25        | 0.158                |
| 46                                                               | 0.133                | 14        | 0.250                | 110       | 0.132                | 44        | 0.125                | 106       | 0.106                |
| 51                                                               | 0.239                | 15        | 0.164                | 128       | 0.235                | 50        | 0.158                | 117       | 0.112                |
| 58                                                               | 0.249                | 39        | 0.109                | 129       | 0.169                | 66        | 0.178                |           |                      |
| 64                                                               | 0.134                | 64        | 0.211                | 130       | 0.194                | 68        | 0.228                |           |                      |
| 65                                                               | 0.450                | 66        | 0.101                |           |                      | 70        | 0.201                |           |                      |
| 66                                                               | 0.193                | 82        | 0.100                |           |                      | 71        | 0.157                |           |                      |
| 68                                                               | 0.139                | 83        | 0.105                |           |                      | 115       | 0.110                |           |                      |
| 69                                                               | 0.145                | 95        | 0.190                |           |                      | 116       | 0.137                |           |                      |
| 71                                                               | 0.190                | 128       | 0.236                |           |                      | 117       | 0.625                |           |                      |
| 72                                                               | 0.194                | 129       | 0.460                |           |                      | 118       | 0.152                |           |                      |
| 101                                                              | 0.116                | 130       | 0.332                |           |                      | 119       | 0.208                |           |                      |
| 112                                                              | 0.104                | 131       | 0.464                |           |                      |           |                      |           |                      |
| 118                                                              | 0.149                |           |                      |           |                      |           |                      |           |                      |
| 119                                                              | 0.259                |           |                      |           |                      |           |                      |           |                      |
| 120                                                              | 0.325                |           |                      |           |                      |           |                      |           |                      |
| 121                                                              | 0.107                |           |                      |           |                      |           |                      |           |                      |

23

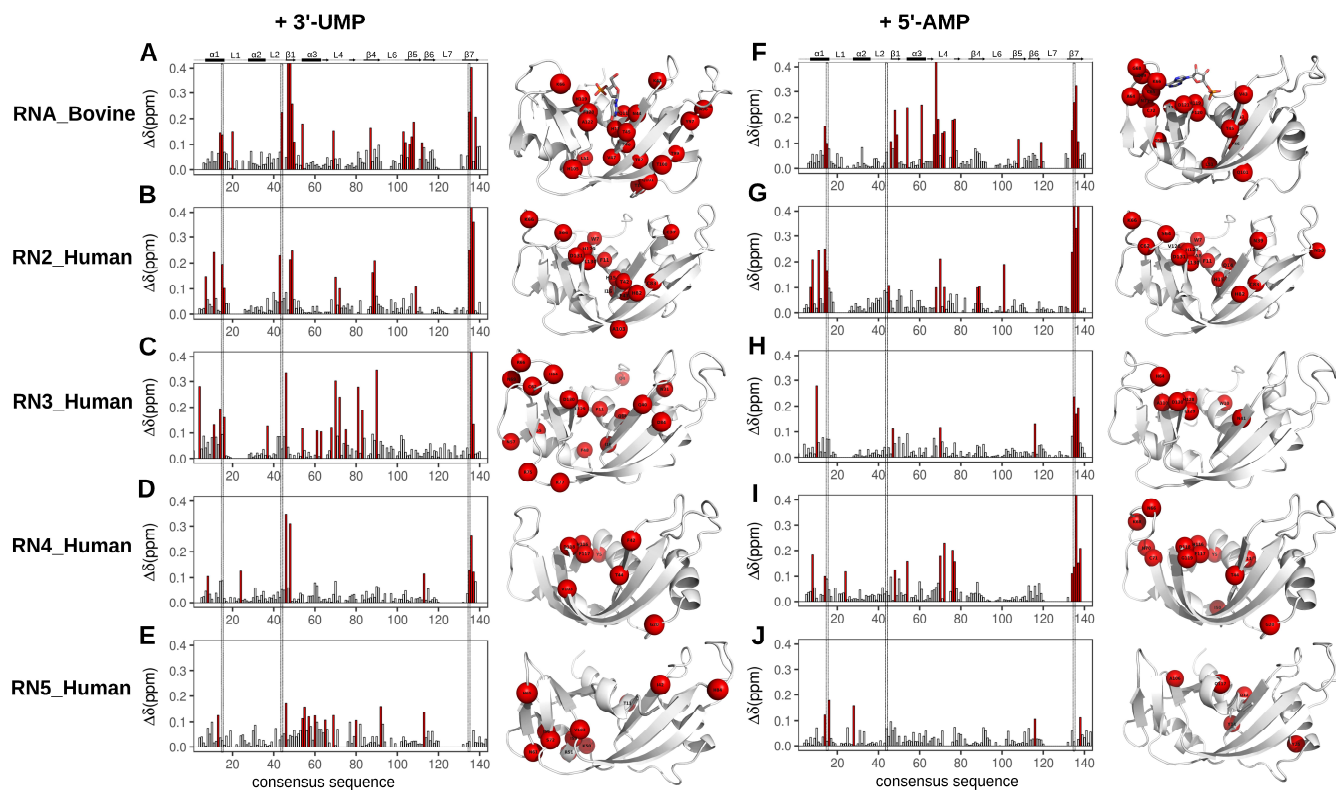

24

25 **Figure S1. Chemical shift perturbations upon ligand binding to RNases.** Compounded chemical shift  
 26 variations ( $\Delta\delta_{\text{obs}}$  at the highest ligand concentration) relative to the apo form upon binding of two  
 27 mononucleotides 3'-UMP (A-E) and 5'-AMP (F-J) for bovine RNase A (A,F) and human RNases 2 (B,G),  
 28 3 (C-H), 4 (D,I) and 5 (E,J) are plotted as function of consensus sequence. Residues displaying  $\Delta\delta_{\text{obs}}$   
 29 greater (lower) than 0.1 ppm are shown as red (white) bars. Active-site residues (His12, Lys41, His119,  
 30 RNase A numbering) are highlighted using dashed lines. Residues with  $\Delta\delta_{\text{obs}} > 0.1$  ppm at the highest  
 31 ligand concentration are depicted as spheres on the three-dimensional structures to the right of the plots.



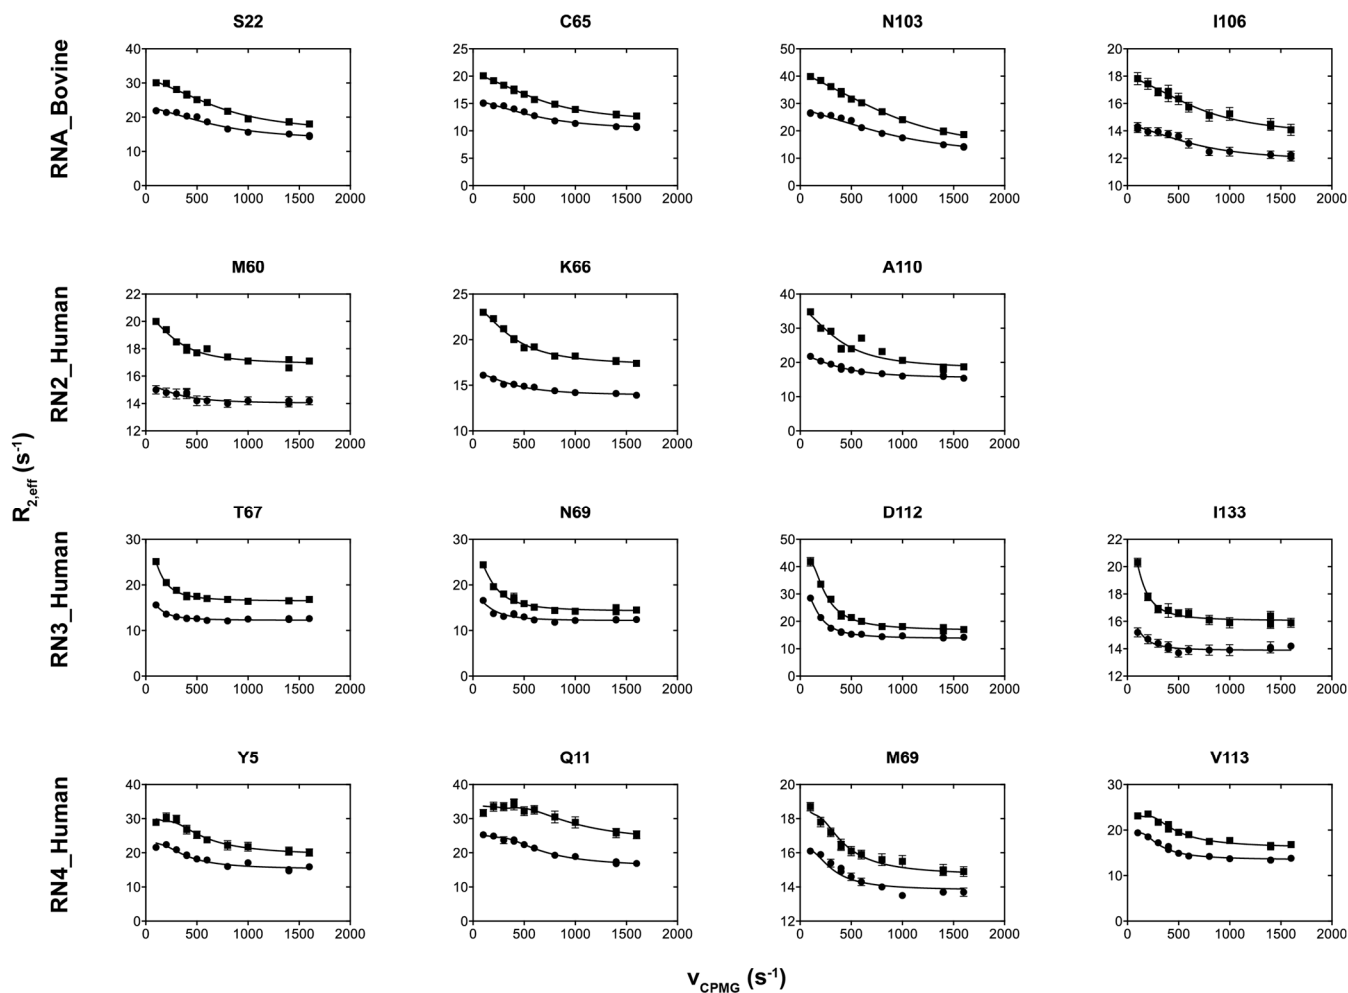

37

38 **Figure S3. Representative  $^{15}\text{N}$ -CPMG relaxation dispersion curves for the different RNases.**  
 39 Relaxation dispersion curves of select residues from the four RNases that display conformational  
 40 exchange in the apo state. As RN5\_Human does not display any such behavior, no curves are shown for  
 41 this enzyme. Squares and circles respectively correspond to data recorded at 800 MHz and at 600 MHz  
 42 (RNA\_Bovine) or 500 MHz (RN2, RN3 and RN4\_Human). Data were dual-fitted to the full Carver-  
 43 Richards relaxation dispersion equation. Residues displaying (un)correlated dynamical changes were  
 44 determined as described in the Methods section of the manuscript.
